# Supplementary material for: Chemical Comparison and Identification of Xanthine Oxidase Inhibitors of Dioscoreae Hypoglaucae Rhizoma and Dioscoreae Spongiosae Rhizoma by Chemometric Analysis and Spectrum–Effect Relationship
Source: MDPI journal article supplement (doi:10.3390/molecules28248116), 2023-12-15
Supplement: s1 [file s1]

## **Supplementary Materials**

**Figure S1** The average peak areas of protodioscin (A), protogracillin (B), dioscin (C) and gracillin (D) in DH and DS samples (\*\*  $P < 0.01$ , \*\*\*  $P < 0.001$ ).

**Table S1** Similarities of 10 batches of DH samples (F1-F10) and 10 batches of DS samples (M1-M10).

**Table S2** Samples of *Dioscoreae hypoglaucae* Rhizoma (DH) and *Dioscoreae spongiosae* Rhizoma (DS).

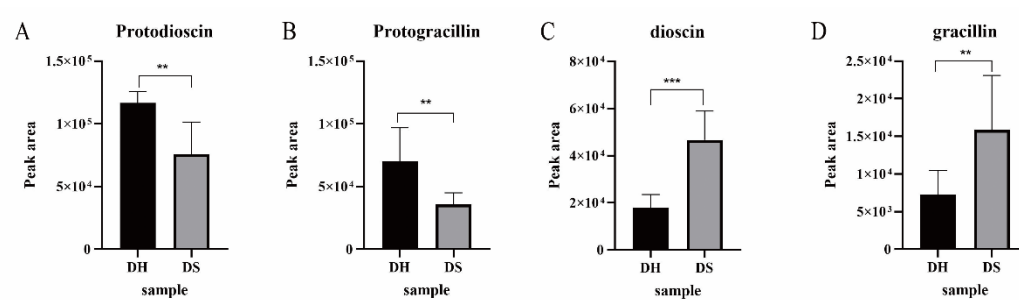

**Figure S1** The average peak areas of protodioscin (A), protogracillin (B), dioscin (C) and gracillin (D) in DH and DS samples (\*\*  $P < 0.01$ , \*\*\*  $P < 0.001$ ).

**Table S1** Similarities of 10 batches of DH samples (F1-F10) and 10 batches of DS samples (M1-M10).

| NO. | Similarity | NO. | Similarity |
|-----|------------|-----|------------|
| F1  | 0.980      | M1  | 0.967      |
| F2  | 0.971      | M2  | 0.983      |
| F3  | 0.991      | M3  | 0.938      |
| F4  | 0.982      | M4  | 0.952      |
| F5  | 0.982      | M5  | 0.944      |
| F6  | 0.98       | M6  | 0.988      |
| F7  | 0.994      | M7  | 0.976      |
| F8  | 0.974      | M8  | 0.98       |
| F9  | 0.976      | M9  | 0.986      |
| F10 | 0.986      | M10 | 0.982      |

**Table S2** Samples of *Dioscoreae hypoglaucae* Rhizoma (DH) and *Dioscoreae spongiosae* Rhizoma (DS).

| NO. | Sample | Origins         | NO. | Sample | Origins         |
|-----|--------|-----------------|-----|--------|-----------------|
| F1  | DH     | Hunan, China    | M1  | DS     | Jiangxi, China  |
| F2  | DH     | Hunan, China    | M2  | DS     | Jiangxi, China  |
| F3  | DH     | Hunan, China    | M3  | DS     | Jiangxi, China  |
| F4  | DH     | Hunan, China    | M4  | DS     | Zhejiang, China |
| F5  | DH     | Hunan, China    | M5  | DS     | Zhejiang, China |
| F6  | DH     | Fujian, China   | M6  | DS     | Zhejiang, China |
| F7  | DH     | Fujian, China   | M7  | DS     | Zhejiang, China |
| F8  | DH     | Fujian, China   | M8  | DS     | Sichuan, China  |
| F9  | DH     | Zhejiang, China | M9  | DS     | Sichuan, China  |
| F10 | DH     | Zhejiang, China | M10 | DS     | Sichuan, China  |
